# Supplementary material
Source: PubMed Central journal article supplement (PMC10074574)
Supplement: mmc1.pdf [file mmc1.pdf]

iScience, Volume 26

## Supplemental information

**Activating a dormant metabolic pathway  
for high-temperature L-alanine  
production in *Bacillus licheniformis***

**Xiao Han, Jiongqin Liu, Yutong Wu, Yuhan Yang, Fei Tao, and Ping Xu**

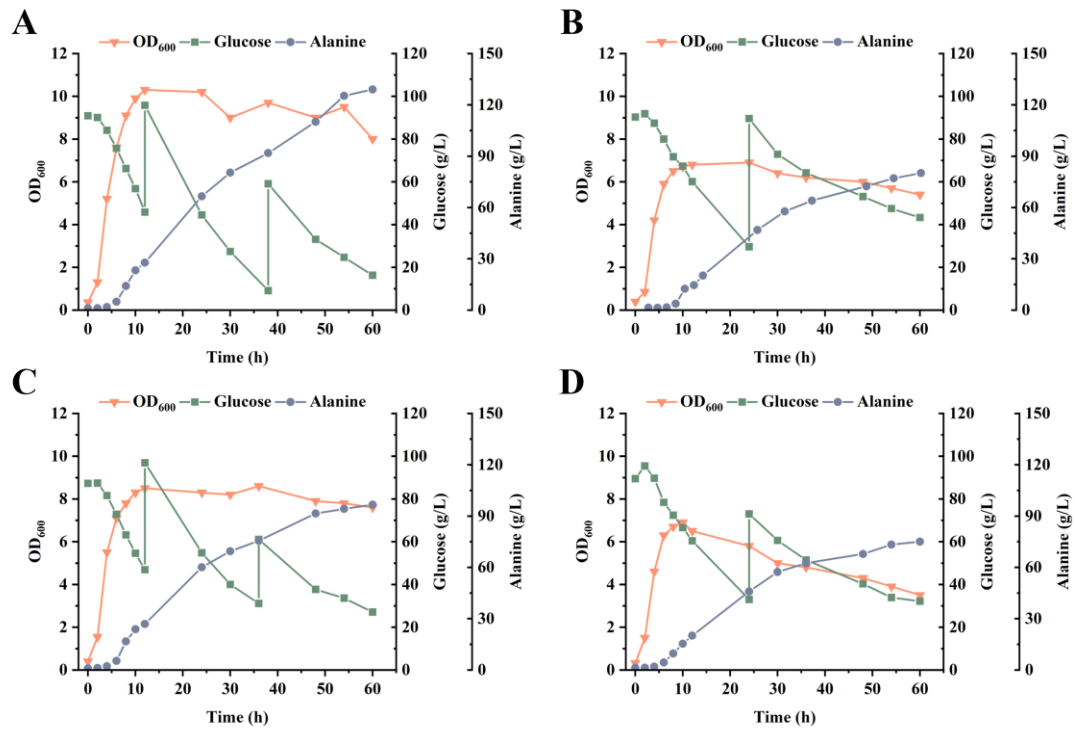

**Figure S1. Fed-batch fermentations of *Bacillus licheniformis* overexpressing alanine dehydrogenases from different sources, related to Figure 1. (A–D) Fed-batch fermentation of *B. licheniformis* BLA1-ald1, BLA1-ald2, BLA1-STald, and BLA1-BSald.**

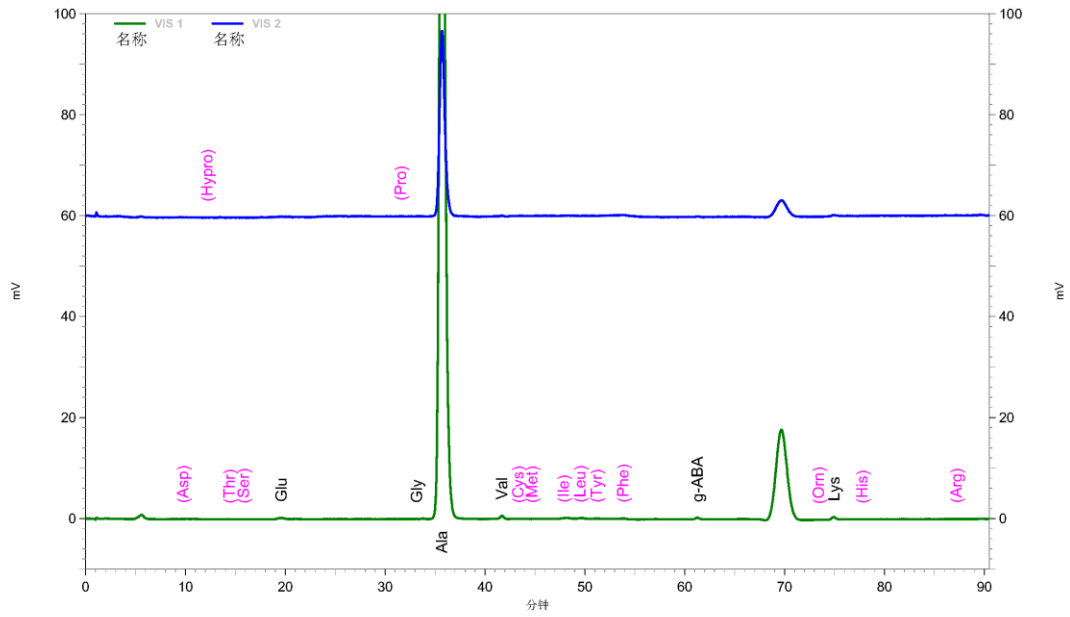

**VIS 1 结果**

| Peak # | Retention Time | Name  | Area     | Resolution | Mol concentration (nmol/mL) | CalcMol (ng/mL) |
|--------|----------------|-------|----------|------------|-----------------------------|-----------------|
|        |                | Asp   |          |            | 0.00 BDL                    | 0.00            |
|        |                | Thr   |          |            | 0.00 BDL                    | 0.00            |
|        |                | Ser   |          |            | 0.00 BDL                    | 0.00            |
| 3      | 19.580         | Glu   | 36372    | 13.96      | 12.05                       | 1771.93         |
| 4      | 33.140         | Gly   | 1056     | 22.21      | 0.34                        | 25.24           |
| 5      | 35.680         | Ala   | 30681140 | 4.37       | 9611.76                     | 856311.98       |
| 6      | 41.687         | Val   | 59514    | 7.65       | 17.98                       | 2105.07         |
|        |                | Cys   |          |            | 0.00 BDL                    | 0.00            |
|        |                | Met   |          |            | 0.00 BDL                    | 0.00            |
|        |                | Ile   |          |            | 0.00 BDL                    | 0.00            |
|        |                | Leu   |          |            | 0.00 BDL                    | 0.00            |
|        |                | Tyr   |          |            | 0.00 BDL                    | 0.00            |
|        |                | Phe   |          |            | 0.00 BDL                    | 0.00            |
| 7      | 61.233         | g-ABA | 31851    | 30.78      | 9.90                        | 1020.42         |
|        |                | Orn   |          |            | 0.00 BDL                    | 0.00            |
| 9      | 74.927         | Lys   | 56914    | 3.74       | 14.67                       | 2144.12         |
|        |                | His   |          |            | 0.00 BDL                    | 0.00            |
|        |                | Arg   |          |            | 0.00 BDL                    | 0.00            |
| 总数     |                |       | 30866847 |            | 9666.68                     |                 |

**VIS 2 结果**

| Peak # | Retention Time | Name  | Area | Resolution | Mol concentration (nmol/mL) | CalcMol (ng/mL) |
|--------|----------------|-------|------|------------|-----------------------------|-----------------|
|        |                | Hypro |      |            | 0.00 BDL                    | 0.00            |
|        |                | Pro   |      |            | 0.00 BDL                    | 0.00            |
| 总数     |                |       |      |            |                             |                 |

**Figure S2. Concentrations of different amino acid by-products in *B. licheniformis* BLA3, related to Figure 2.** The concentrations of free amino acids were detected by L-8900 automatic amino acid analyzer. Fermentation end product samples were diluted 100-fold before being assayed.

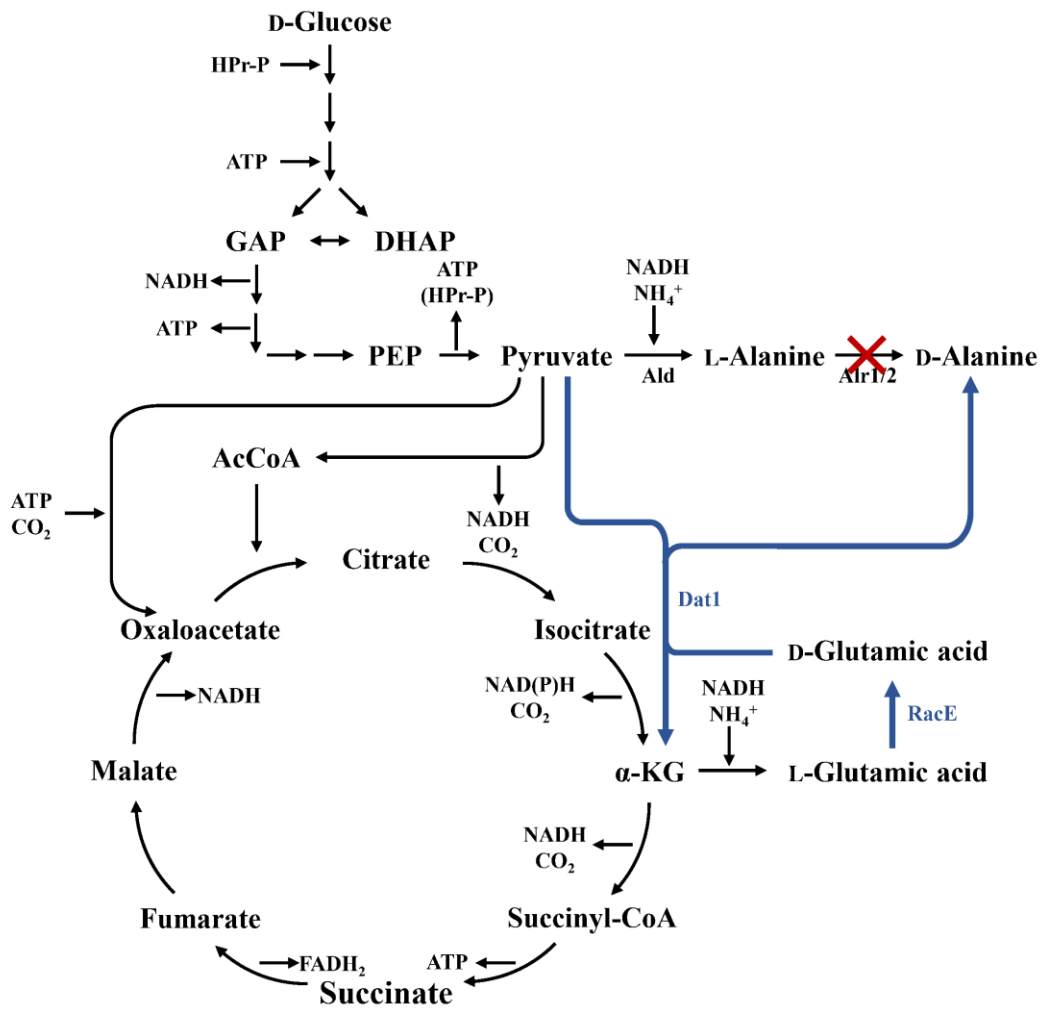

**Figure S3. The alternate D-alanine synthesis pathway in *B. licheniformis*, related to Figure 4.** The main reaction of the alternate D-alanine synthesis pathway was marked in blue in the picture. L-Glutamate was converted to D-glutamate catalyzed by the glutamate racemase RacE, and subsequently converted to D-alanine catalyzed by the D-amino acid aminotransferase Dat1.

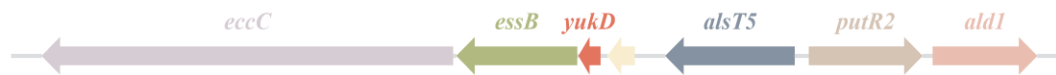

**Figure S4. Genome upstream and downstream genes of *alsT5* in *B. licheniformis*, related to Figure 5.** The *alsT5* gene is located in the upstream region of the *ald1* gene encoding alanine dehydrogenase, suggesting that it may be involved in alanine transport.

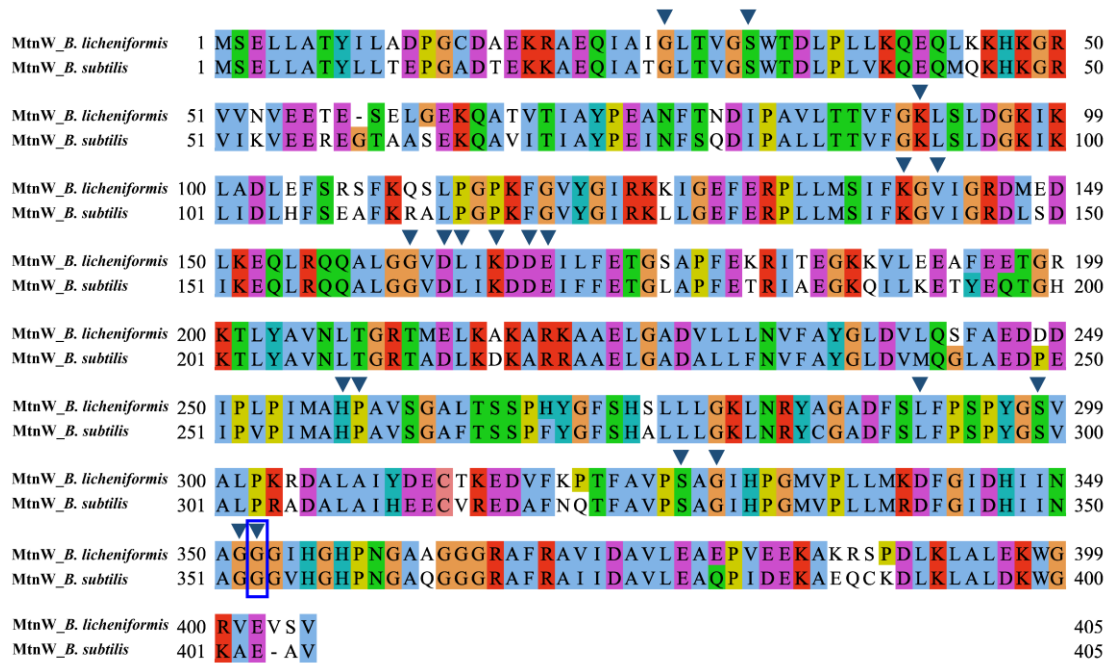

**Figure S5. Amino acid sequences alignment between *B. licheniformis* MtnW and *B. subtilis* MtnW, related to Figure 5.** The residues involved in the substrate binding and catalytic activity of MtnW were marked by dark blue triangles. Site where SNP occurred in MtnW in evolved strain *B. licheniformis* BLA3-E1 was highlighted by a blue box.

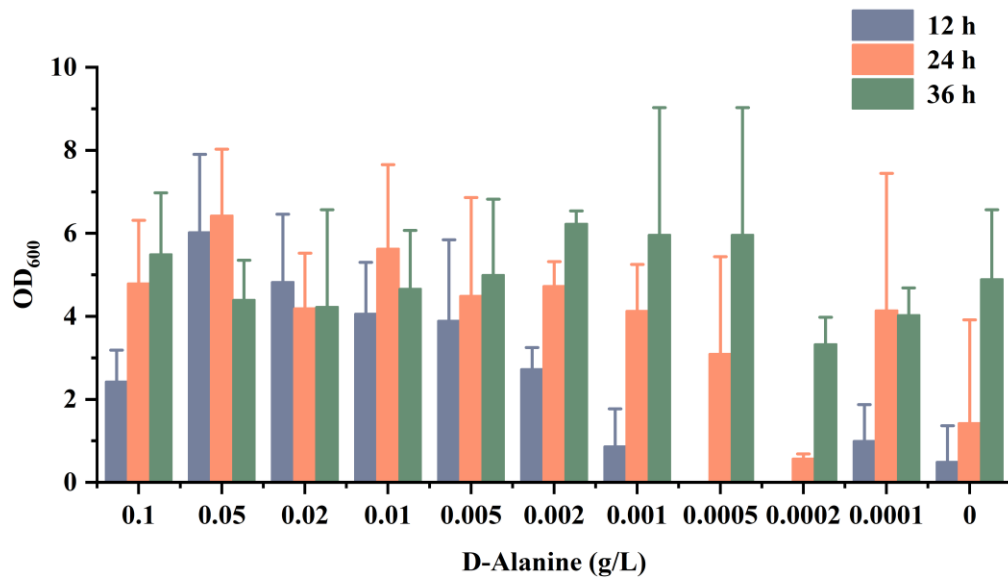

**Figure S6. Identification of the effects of *mtnW* on the exogenous D-alanine dependence of the *B. licheniformis* BLA3 $\Delta$ *dltB*, related to Figure 5.**

Characterization of the D-alanine dependence on *B. licheniformis* BLA3 $\Delta$ *dltB* $\Delta$ *mtnW* by testing the growth performance in media containing various concentrations of D-alanine. Triplicate experiments were carried out for physiological measurements, and error bars represent standard deviations.

**Table S1. Concentrations of organic acid and alcohol by-products in different *B. licheniformis*, related to Figure 2.**

| Strain | Succinic acid | Lactic acid | Glycerol | Formic acid | Acetic acid |
|--------|---------------|-------------|----------|-------------|-------------|
| BLA3   | 0.9 g/L       | 0.4 g/L     | 6.6 g/L  | 1.6 g/L     | 2.7 g/L     |
| BLA4   | 0.8 g/L       | 1.3 g/L     | ND       | 1.8 g/L     | 1.7 g/L     |

ND, undetectable.



**Table S2. Summary of SNPs and InDels occurring in BLA3-E1 compared to BLA3, related to Figure 5.**

| Type  | Position and content                       | Description                                                                                                                                           |
|-------|--------------------------------------------|-------------------------------------------------------------------------------------------------------------------------------------------------------|
| SNP   | 338665, G to T                             | Hypothetical protein gene, missense mutation, L59F                                                                                                    |
| SNP   | 609159, C to A                             | Intergenic region between sortase gene and inositol transport protein gene <i>iolT</i>                                                                |
| SNP   | 920866, A to G                             | Intergenic region between hypothetical protein gene and 16S ribosomal RNA gene                                                                        |
| SNP   | 1491092, G to T                            | 2,3-diketo-5-methylthiopentyl-1-phosphate enolase gene <i>mtnW</i> , missense mutation, G352V                                                         |
| SNP   | 2210832, G to T                            | Sporulenol synthase gene <i>sqhC</i> , missense mutation, A432S                                                                                       |
| SNP   | 2525390, C to T                            | Biotin carboxylase gene <i>accC2</i> , missense mutation, R149H                                                                                       |
| SNP   | 3139007, C to T                            | Sodium/glucose cotransporter gene <i>sglT</i> , missense mutation, P263L                                                                              |
| SNP   | 3233706, C to T                            | Sodium:alanine symporter family protein gene <i>alsT5</i> , missense mutation, V165I                                                                  |
| SNP   | 3612548, C to T                            | Two-component sensor histidine kinase gene <i>degS</i> , missense mutation, E65K                                                                      |
| InDel | 3234341,<br>CAAAATTTTTTCA<br>TGCAAA to CAA | Intergenic region between sodium:alanine symporter family protein gene <i>alsT5</i> and proline-responsive transcriptional activator gene <i>putR</i> |
| InDel | 3905875, GC to G                           | Teichoic acid D-alanyltransferase <i>dltB</i> , frame shift mutation after the position 408                                                           |

**Table S3. Strains and plasmids used in this study, related to STAR Methods.**

| Strain or plasmid              | Description                                                                                                                                     |
|--------------------------------|-------------------------------------------------------------------------------------------------------------------------------------------------|
| <b>plasmids</b>                |                                                                                                                                                 |
| pKVM1                          | <i>E. coli/B. licheniformis</i> shuttle vector, Amp <sup>r</sup> and Em <sup>r</sup>                                                            |
| pKVM1-PFYAK                    | Vector for introducing the <i>pfkA</i> and <i>pyk</i> genes from <i>B. coagulans</i> into strain BN11 with the strong promoter P <sub>als</sub> |
| pKVM1Δ <i>ldhT<sub>i</sub></i> | Vector for deleting the <i>ldhT<sub>i</sub></i> gene in strain BN11-PFYAK                                                                       |
| pKVM1- <i>ald1</i>             | Vector for introducing another copy of <i>ald1</i> gene into strain BLA1 with the strong promoter P <sub>als</sub>                              |
| pKVM1- <i>ald2</i>             | Vector for introducing another copy of <i>ald2</i> gene into strain BLA1 with the strong promoter P <sub>als</sub>                              |
| pKVM1- <i>GSald</i>            | Vector for introducing the codon-optimized <i>GSald</i> gene into strain BLA1 with the strong promoter P <sub>als</sub>                         |
| pKVM1- <i>STald</i>            | Vector for introducing the codon-optimized <i>STald</i> gene into strain BLA1 with the strong promoter P <sub>als</sub>                         |
| pKVM1- <i>BSald</i>            | Vector for introducing the codon-optimized <i>BSald</i> gene into strain BLA1 with the strong promoter P <sub>als</sub>                         |
| pKVM1Δ <i>alr1</i>             | Vector for deleting the <i>alr1</i> gene in strain BLA2                                                                                         |
| pKVM1Δ <i>alr2</i>             | Vector for deleting the <i>alr2</i> gene in strain BLA2 or BLA2Δ <i>alr1</i>                                                                    |
| pKVM1Δ <i>dgp</i>              | Vector for deleting the <i>dgp</i> gene in strain BLA3                                                                                          |
| pKVMΔ <i>dltB</i>              | Vector for deleting the <i>dltB</i> gene in strain BLA3                                                                                         |
| pKVMΔ <i>mtnW</i>              | Vector for deleting the <i>mtnW</i> gene in strain BLA3 or BLA3Δ <i>dltB</i>                                                                    |
| pKVMΔ <i>alsT5</i>             | Vector for deleting the <i>alsT5</i> gene in strain BLA3 or BLA3-E1                                                                             |
| pKVMΔ <i>dat1</i>              | Vector for deleting the <i>dat1</i> gene in strain BLA3 or BLA3-E1                                                                              |
| pKVM- <i>dat1</i>              | Vector for introducing another copy of <i>dat1</i> gene into strain BLA3 with the strong promoter P <sub>als</sub>                              |

---

**strains**

|                               |                                                                      |
|-------------------------------|----------------------------------------------------------------------|
| <i>B. licheniformis</i>       | Efficient D-lactate producer, <i>B. licheniformis</i> ATCC 14580     |
| BN11                          | $\Delta hsdR1\Delta hsdR2\Delta ldh\Delta alsS\Delta alsD::ldh_{Ti}$ |
| <i>E. coli</i> S17-1          | Conjugative strain able to host $\lambda$ -pir-dependent plasmids    |
| BN11-PFYAK                    | BN11::P <sub>als</sub> PFYAK                                         |
| BLA1                          | BN11-PFYAK $\Delta ldh_{Ti}$                                         |
| BLA1-Pald1                    | BLA1::P <sub>alsald1</sub>                                           |
| BLA1-Pald2                    | BLA1::P <sub>alsald2</sub>                                           |
| BLA2                          | BLA1::P <sub>alsGSald</sub>                                          |
| BLA1-PSTald                   | BLA1::P <sub>alsSTald</sub>                                          |
| BLA1-PBSald                   | BLA1::P <sub>alsBSald</sub>                                          |
| BLA2 $\Delta alr1$            | BLA2 $\Delta alr1$                                                   |
| BLA2 $\Delta alr2$            | BLA2 $\Delta alr2$                                                   |
| BLA3                          | BLA2 $\Delta alr1\Delta alr2$                                        |
| BLA4                          | BLA3 $\Delta dgp$                                                    |
| BLA3-E1                       | Evolved BLA3 which can grow without adding D-alanine                 |
| BLA3 $\Delta dltB$            | BLA3 $\Delta dltB$                                                   |
| BLA3 $\Delta mtnW$            | BLA3 $\Delta mtnW$                                                   |
| BLA3 $\Delta alsT5$           | BLA3 $\Delta alsT5$                                                  |
| BLA3-E1 $\Delta alsT5$        | BLA3-E1 $\Delta alsT5$                                               |
| BLA3 $\Delta dltB\Delta mtnW$ | BLA3 $\Delta dltB\Delta mtnW$                                        |
| BLA3 $\Delta dat1$            | BLA3 $\Delta dat1$                                                   |
| BLA3-E1 $\Delta dat1$         | BLA3-E1 $\Delta dat1$                                                |
| BLA3-Pdat1                    | BLA3::P <sub>alsdat1</sub>                                           |

---
